# Supplementary material for: Extraction of Individual EEG Gamma Frequencies from the Responses to Click-Based Chirp-Modulated Sounds
Source: MDPI journal article supplement (doi:10.3390/s23052826), 2023-03-04
Supplement: s1 [file s1]

Table S1. P values of Wilcoxon pairwise comparison across IGF extraction conditions with wet electrodes.

|                                     | (1)     | (2)     | (3)     | (4)     | (5)     | (6)     | (7)   | (8)   | (9)   | (10)  | (11)  |
|-------------------------------------|---------|---------|---------|---------|---------|---------|-------|-------|-------|-------|-------|
| (1) 15 electrodes kept, down-up     | -       |         |         |         |         |         |       |       |       |       |       |
| (2) 15 electrodes kept, down        | 0.107   | -       |         |         |         |         |       |       |       |       |       |
| (3) 15 electrodes kept, up          | 1.000   | 0.157   | -       |         |         |         |       |       |       |       |       |
| (4) 3 electrodes kept, down-up      | 1.000   | 0.001   | 1.000   | -       |         |         |       |       |       |       |       |
| (5) 3 electrodes kept, down         | 1.000   | 1.000   | 1.000   | 0.751   | -       |         |       |       |       |       |       |
| (6) 3 electrodes kept, up           | 1.000   | 0.002   | 1.000   | 1.000   | 1.000   | -       |       |       |       |       |       |
| (7) 15 electrodes averaged, down-up | < 0.001 | < 0.001 | < 0.001 | < 0.001 | < 0.001 | < 0.001 | -     |       |       |       |       |
| (8) 15 electrodes averaged, down    | < 0.001 | < 0.001 | < 0.001 | 0.005   | < 0.001 | < 0.001 | 0.017 | -     |       |       |       |
| (9) 15 electrodes averaged, up      | < 0.001 | < 0.001 | < 0.001 | < 0.001 | < 0.001 | < 0.001 | 1.000 | 0.177 | -     |       |       |
| (10) 3 electrodes averaged, down-up | < 0.001 | < 0.001 | < 0.001 | < 0.001 | < 0.001 | < 0.001 | 1.000 | 0.570 | 1.000 | -     |       |
| (11) 3 electrodes averaged, down    | < 0.001 | < 0.001 | < 0.001 | 0.009   | < 0.001 | < 0.001 | 0.013 | 1.000 | 0.122 | 0.435 | -     |
| (12) 3 electrodes averaged, up      | < 0.001 | < 0.001 | < 0.001 | < 0.001 | < 0.001 | < 0.001 | 1.000 | 1.000 | 1.000 | 1.000 | 1.000 |

Table S2. P values of Wilcoxon pairwise comparison across IGF extraction conditions with dry electrodes.

|                                    | (1)     | (2)     | (3)     | (4)   | (5)   |
|------------------------------------|---------|---------|---------|-------|-------|
| (1) 3 electrodes kept, down-up     | -       |         |         | -     |       |
| (2) 3 electrodes kept, down        | 1.000   | -       |         |       | -     |
| (3) 3 electrodes kept, up          | 1.000   | 1.000   | -       |       |       |
| (4) 3 electrodes averaged, down-up | < 0.001 | 1.000   | 1.000   | -     |       |
| (5) 3 electrodes averaged, down    | 1.000   | < 0.001 | 1.000   | 1.000 | -     |
| (6) 3 electrodes averaged, up      | 1.000   | 1.000   | < 0.001 | 1.000 | 1.000 |
